# Supplementary material for: Novel Loci for Adiponectin Levels and Their Influence on Type 2 Diabetes and Metabolic Traits: A Multi-Ethnic Meta-Analysis of 45,891 Individuals
Source: PLOS journal article supplement (doi:10.1371/journal.pgen.1002607), 2012-03-29
Supplement: S5 (10.1371/journal.pgen.1002607.s005) [file journal.pgen.1002607.s005]

**Table S2: Comparing the Genome-Wide Significant SNPs from fixed effect model with random effect model.**

| SNP        | Chr/Pos     | EA/NEA | EAF  | Discovery-fixed Effect |          | Discovery-Random Effect |          | Q-PValue | I <sup>2</sup> |
|------------|-------------|--------|------|------------------------|----------|-------------------------|----------|----------|----------------|
|            |             |        |      | Beta (SE)              | P-Value  | Beta (SE)               | P-Value  |          |                |
| rs13081028 | 3/52530356  | G/A    | 0.43 | -0.03(0.004)           | 1.05E-09 | -0.03(0.006)            | 1.46E-05 | 0.07     | 0.4            |
| rs9853056  | 3/52530997  | T/C    | 0.43 | -0.03(0.004)           | 9.37E-10 | -0.03(0.006)            | 1.31E-05 | 0.07     | 0.4            |
| rs4282054  | 3/52541105  | T/C    | 0.43 | -0.03(0.004)           | 6.25E-10 | -0.03(0.006)            | 9.13E-06 | 0.08     | 0.4            |
| rs12489828 | 3/52542054  | T/G    | 0.55 | 0.03(0.004)            | 5.49E-08 | 0.02(0.006)             | 3.24E-04 | 0.03     | 0.4            |
| rs2590838  | 3/52597126  | G/A    | 0.49 | -0.03(0.004)           | 7.05E-11 | -0.03(0.006)            | 2.48E-06 | 0.10     | 0.3            |
| rs2276824  | 3/52612526  | G/C    | 0.57 | 0.03(0.005)            | 3.06E-10 | 0.03(0.006)             | 6.07E-06 | 0.10     | 0.3            |
| rs9879090  | 3/52623305  | T/C    | 0.43 | -0.03(0.005)           | 2.68E-10 | -0.03(0.006)            | 5.98E-06 | 0.10     | 0.3            |
| rs13083798 | 3/52624788  | G/A    | 0.51 | 0.03(0.004)            | 5.18E-11 | 0.03(0.006)             | 2.51E-06 | 0.10     | 0.3            |
| rs1108842  | 3/52695120  | C/A    | 0.51 | 0.03(0.004)            | 3.66E-11 | 0.03(0.006)             | 2.06E-06 | 0.10     | 0.3            |
| rs11235    | 3/52720127  | T/C    | 0.57 | 0.03(0.005)            | 2.80E-10 | 0.03(0.006)             | 5.76E-06 | 0.10     | 0.3            |
| rs2710323  | 3/52790945  | T/C    | 0.51 | -0.03(0.004)           | 2.90E-10 | -0.03(0.005)            | 9.07E-07 | 0.17     | 0.3            |
| rs3617     | 3/52808845  | C/A    | 0.54 | -0.03(0.004)           | 2.20E-08 | -0.03(0.005)            | 7.29E-07 | 0.31     | 0.1            |
| rs4481150  | 3/52812833  | T/C    | 0.53 | -0.03(0.004)           | 3.33E-08 | -0.02(0.006)            | 2.70E-05 | 0.16     | 0.3            |
| rs2535627  | 3/52820145  | T/C    | 0.53 | -0.03(0.004)           | 2.54E-08 | -0.02(0.006)            | 3.07E-05 | 0.14     | 0.3            |
| rs2071044  | 3/52822641  | T/C    | 0.47 | 0.03(0.004)            | 3.65E-08 | 0.02(0.006)             | 3.51E-05 | 0.14     | 0.3            |
| rs7636643  | 3/151532470 | T/A    | 0.09 | -0.04(0.008)           | 2.77E-08 | -0.04(0.008)            | 2.77E-08 | 0.99     | 0.0            |
| rs16862607 | 3/151533988 | G/A    | 0.09 | -0.04(0.008)           | 2.76E-08 | -0.04(0.008)            | 2.76E-08 | 0.99     | 0.0            |
| rs16862610 | 3/151535497 | T/C    | 0.91 | 0.04(0.008)            | 2.55E-08 | 0.04(0.008)             | 2.55E-08 | 0.99     | 0.0            |
| rs2060662  | 3/151536642 | G/C    | 0.09 | -0.04(0.008)           | 2.50E-08 | -0.04(0.008)            | 2.50E-08 | 0.99     | 0.0            |
| rs1597466  | 3/151538251 | T/G    | 0.10 | -0.04(0.008)           | 1.89E-08 | -0.04(0.008)            | 1.89E-08 | 0.98     | 0.0            |
| rs7616723  | 3/151538334 | G/A    | 0.91 | 0.04(0.008)            | 2.62E-08 | 0.04(0.008)             | 2.62E-08 | 0.99     | 0.0            |
| rs7617025  | 3/151538648 | G/A    | 0.90 | 0.04(0.008)            | 2.26E-08 | 0.04(0.008)             | 2.26E-08 | 0.99     | 0.0            |
| rs7646517  | 3/187902864 | T/C    | 0.12 | -0.04(0.007)           | 4.50E-10 | -0.04(0.007)            | 4.50E-10 | 0.48     | 0.0            |
| rs11927941 | 3/187915740 | G/A    | 0.32 | -0.03(0.005)           | 3.99E-10 | -0.03(0.006)            | 1.21E-06 | 0.12     | 0.3            |
| rs10937266 | 3/187915769 | G/A    | 0.69 | 0.03(0.005)            | 1.21E-09 | 0.03(0.006)             | 5.36E-06 | 0.09     | 0.3            |
| rs11924390 | 3/187915793 | T/C    | 0.69 | 0.03(0.005)            | 1.23E-09 | 0.03(0.006)             | 5.69E-06 | 0.09     | 0.4            |
| rs3774291  | 3/187916165 | T/C    | 0.32 | -0.03(0.005)           | 1.21E-09 | -0.03(0.006)            | 5.46E-06 | 0.09     | 0.3            |
| rs3774292  | 3/187916268 | T/A    | 0.32 | -0.03(0.005)           | 4.70E-09 | -0.03(0.007)            | 1.10E-04 | 0.03     | 0.5            |
| rs10440056 | 3/187916516 | T/C    | 0.32 | -0.03(0.005)           | 4.76E-09 | -0.03(0.007)            | 1.11E-04 | 0.03     | 0.5            |
| rs3821815  | 3/187916956 | T/C    | 0.68 | 0.03(0.005)            | 6.39E-09 | 0.03(0.007)             | 1.22E-04 | 0.03     | 0.5            |
| rs1851665  | 3/187919092 | G/A    | 0.32 | -0.03(0.005)           | 8.65E-09 | -0.03(0.007)            | 1.92E-04 | 0.02     | 0.5            |
| rs1836860  | 3/187919298 | T/C    | 0.68 | 0.03(0.005)            | 7.30E-09 | 0.03(0.007)             | 2.02E-04 | 0.02     | 0.5            |
| rs1403694  | 3/187922692 | T/C    | 0.61 | 0.03(0.004)            | 1.50E-09 | 0.03(0.006)             | 2.02E-05 | 0.04     | 0.4            |
| rs1648722  | 3/187931683 | T/C    | 0.39 | -0.03(0.004)           | 3.41E-12 | -0.03(0.006)            | 3.13E-07 | 0.07     | 0.4            |
| rs1656925  | 3/187931817 | T/C    | 0.62 | 0.03(0.004)            | 1.29E-11 | 0.03(0.006)             | 4.77E-07 | 0.08     | 0.4            |
| rs1648698  | 3/187932276 | G/C    | 0.62 | 0.03(0.004)            | 1.25E-11 | 0.03(0.006)             | 4.40E-07 | 0.08     | 0.4            |
| rs1648700  | 3/187932610 | T/C    | 0.62 | 0.03(0.004)            | 1.75E-11 | 0.03(0.006)             | 3.85E-07 | 0.09     | 0.3            |

|            |             |     |      |              |          |              |          |         |     |
|------------|-------------|-----|------|--------------|----------|--------------|----------|---------|-----|
| rs1624569  | 3/187932763 | T/C | 0.62 | 0.03(0.004)  | 1.31E-11 | 0.03(0.006)  | 4.75E-07 | 0.08    | 0.4 |
| rs710448   | 3/187935579 | G/A | 0.38 | -0.03(0.004) | 2.17E-11 | -0.03(0.006) | 3.32E-06 | 0.04    | 0.4 |
| rs5030060  | 3/187935611 | T/C | 0.31 | 0.03(0.005)  | 2.22E-09 | 0.03(0.006)  | 7.20E-06 | 0.07    | 0.4 |
| rs822363   | 3/187935685 | G/C | 0.38 | -0.03(0.005) | 3.12E-11 | -0.03(0.006) | 2.12E-06 | 0.05    | 0.4 |
| rs5030062  | 3/187936874 | C/A | 0.38 | 0.03(0.005)  | 2.77E-12 | 0.04(0.008)  | 7.12E-06 | 1.0E-03 | 0.6 |
| rs5030072  | 3/187938240 | T/C | 0.56 | -0.03(0.005) | 9.89E-11 | -0.03(0.008) | 2.50E-05 | 2.1E-03 | 0.6 |
| rs3856930  | 3/187941016 | T/C | 0.35 | 0.03(0.005)  | 2.31E-10 | 0.03(0.007)  | 9.97E-06 | 0.01    | 0.5 |
| rs698078   | 3/187941921 | G/A | 0.41 | 0.03(0.004)  | 7.19E-13 | 0.04(0.007)  | 1.95E-06 | 3.8E-03 | 0.6 |
| rs710446   | 3/187942621 | T/C | 0.59 | -0.03(0.004) | 1.84E-12 | -0.04(0.007) | 5.09E-06 | 1.9E-03 | 0.6 |
| rs5030091  | 3/187943571 | T/C | 0.59 | 0.04(0.005)  | 9.67E-14 | 0.04(0.007)  | 2.99E-07 | 0.03    | 0.5 |
| rs2062632  | 3/187943875 | T/C | 0.75 | 0.06(0.006)  | 2.52E-19 | 0.06(0.006)  | 8.78E-17 | 0.33    | 0.1 |
| rs266760   | 3/187943910 | G/A | 0.72 | 0.05(0.007)  | 3.62E-13 | 0.05(0.007)  | 1.72E-12 | 0.40    | 0.0 |
| rs1972703  | 3/187946037 | G/A | 0.84 | 0.06(0.007)  | 6.96E-16 | 0.06(0.008)  | 2.66E-13 | 0.29    | 0.1 |
| rs822373   | 3/187953880 | G/A | 0.34 | 0.03(0.005)  | 1.77E-09 | 0.03(0.005)  | 1.77E-09 | 0.47    | 0.0 |
| rs266749   | 3/187954613 | T/C | 0.36 | 0.03(0.005)  | 1.72E-10 | 0.03(0.005)  | 4.67E-09 | 0.31    | 0.1 |
| rs266743   | 3/187958485 | T/C | 0.24 | -0.05(0.006) | 5.74E-14 | -0.05(0.007) | 2.07E-11 | 0.25    | 0.2 |
| rs266742   | 3/187958539 | T/G | 0.65 | -0.04(0.005) | 2.93E-12 | -0.04(0.005) | 2.93E-12 | 0.59    | 0.0 |
| rs822355   | 3/187962817 | T/C | 0.68 | -0.05(0.006) | 2.20E-16 | -0.05(0.006) | 2.20E-16 | 0.48    | 0.0 |
| rs822354   | 3/187962900 | G/A | 0.68 | -0.05(0.005) | 1.53E-20 | -0.05(0.005) | 1.53E-20 | 0.61    | 0.0 |
| rs266733   | 3/187976007 | T/G | 0.51 | 0.05(0.005)  | 3.99E-22 | 0.05(0.006)  | 8.31E-15 | 0.13    | 0.3 |
| rs185554   | 3/187977116 | G/A | 0.52 | 0.05(0.005)  | 3.06E-27 | 0.05(0.006)  | 1.15E-18 | 0.16    | 0.3 |
| rs266719   | 3/187984342 | T/C | 0.22 | 0.07(0.005)  | 4.92E-38 | 0.08(0.009)  | 5.51E-16 | 2.1E-03 | 0.6 |
| rs3900626  | 3/187984594 | T/C | 0.17 | -0.05(0.006) | 5.71E-13 | -0.05(0.007) | 9.19E-11 | 0.30    | 0.1 |
| rs1426810  | 3/187986129 | G/A | 0.36 | 0.05(0.005)  | 2.84E-30 | 0.06(0.007)  | 1.01E-14 | 0.01    | 0.5 |
| rs1354091  | 3/187988594 | T/G | 0.74 | 0.05(0.005)  | 9.71E-20 | 0.05(0.005)  | 2.24E-18 | 0.39    | 0.1 |
| rs2066500  | 3/187990616 | T/C | 0.26 | -0.05(0.005) | 9.72E-20 | -0.05(0.005) | 1.20E-18 | 0.40    | 0.0 |
| rs266759   | 3/187991006 | T/C | 0.49 | -0.05(0.004) | 1.96E-29 | -0.05(0.006) | 1.63E-17 | 0.09    | 0.4 |
| rs266756   | 3/187991268 | G/C | 0.22 | 0.07(0.006)  | 2.21E-38 | 0.08(0.009)  | 8.47E-17 | 3.1E-03 | 0.6 |
| rs266754   | 3/187991660 | T/C | 0.48 | -0.05(0.004) | 2.32E-29 | -0.05(0.006) | 2.79E-17 | 0.08    | 0.4 |
| rs187868   | 3/187992211 | G/A | 0.52 | 0.05(0.004)  | 1.21E-29 | 0.05(0.006)  | 2.16E-17 | 0.08    | 0.4 |
| rs3917117  | 3/187998538 | G/A | 0.74 | 0.05(0.005)  | 3.53E-20 | 0.05(0.005)  | 3.53E-20 | 0.49    | 0.0 |
| rs843991   | 3/187999122 | T/C | 0.49 | 0.05(0.004)  | 2.73E-30 | 0.05(0.005)  | 1.29E-20 | 0.17    | 0.3 |
| rs3917110  | 3/188001346 | G/C | 0.26 | -0.05(0.005) | 1.47E-20 | -0.05(0.005) | 1.47E-20 | 0.48    | 0.0 |
| rs3917109  | 3/188001500 | C/A | 0.73 | 0.05(0.006)  | 5.22E-15 | 0.05(0.006)  | 2.48E-14 | 0.41    | 0.0 |
| rs16861184 | 3/188003171 | T/C | 0.26 | -0.05(0.005) | 9.62E-21 | -0.05(0.005) | 9.62E-21 | 0.51    | 0.0 |
| rs710450   | 3/188005327 | C/A | 0.49 | -0.05(0.005) | 1.97E-19 | -0.05(0.007) | 1.59E-11 | 0.10    | 0.4 |
| rs2293243  | 3/188005431 | T/A | 0.26 | -0.05(0.005) | 5.34E-21 | -0.05(0.005) | 5.34E-21 | 0.54    | 0.0 |
| rs266717   | 3/188013178 | T/C | 0.48 | 0.04(0.005)  | 1.62E-20 | 0.05(0.012)  | 1.38E-05 | 2.2E-12 | 0.8 |
| rs16861189 | 3/188018128 | G/C | 0.47 | -0.03(0.005) | 4.82E-08 | -0.03(0.006) | 2.57E-05 | 0.10    | 0.3 |
| rs6810075  | 3/188031259 | T/C | 0.63 | 0.07(0.005)  | 3.56E-41 | 0.07(0.005)  | 3.56E-41 | 0.65    | 0.0 |
| rs10937273 | 3/188032389 | G/A | 0.58 | -0.04(0.005) | 9.61E-18 | -0.04(0.006) | 9.03E-11 | 0.09    | 0.3 |
| rs1648707  | 3/188034405 | C/A | 0.36 | -0.06(0.005) | 8.63E-40 | -0.06(0.005) | 8.63E-40 | 0.68    | 0.0 |
| rs864265   | 3/188036986 | T/G | 0.14 | -0.04(0.006) | 1.43E-08 | -0.04(0.008) | 1.38E-05 | 0.10    | 0.3 |

|                   |                     |            |             |                     |                 |                     |                 |             |            |
|-------------------|---------------------|------------|-------------|---------------------|-----------------|---------------------|-----------------|-------------|------------|
| rs822387          | 3/188038731         | T/C        | 0.92        | -0.15(0.009)        | 7.43E-61        | -0.15(0.014)        | 7.97E-24        | 3.6E-03     | 0.6        |
| rs17300539        | 3/188042154         | G/A        | 0.94        | -0.18(0.01)         | 4.49E-77        | -0.19(0.016)        | 4.69E-31        | 2.2E-03     | 0.6        |
| <b>rs266729</b>   | <b>3/188042168</b>  | <b>G/C</b> | <b>0.27</b> | <b>-0.06(0.005)</b> | <b>3.33E-29</b> | <b>-0.06(0.005)</b> | <b>3.33E-29</b> | <b>0.80</b> | <b>0.0</b> |
| <b>rs182052</b>   | <b>3/188043476</b>  | <b>G/A</b> | <b>0.64</b> | <b>0.06(0.005)</b>  | <b>6.65E-41</b> | <b>0.06(0.005)</b>  | <b>6.65E-41</b> | <b>0.52</b> | <b>0.0</b> |
| rs16861209        | 3/188045808         | C/A        | 0.93        | -0.19(0.01)         | 3.27E-77        | -0.2(0.018)         | 1.62E-28        | 5.8E-04     | 0.6        |
| rs16861210        | 3/188049192         | G/A        | 0.93        | -0.18(0.01)         | 9.20E-73        | -0.19(0.016)        | 2.45E-31        | 0.01        | 0.5        |
| <b>rs12495941</b> | <b>3/188050874</b>  | <b>T/G</b> | <b>0.33</b> | <b>0.04(0.006)</b>  | <b>6.15E-12</b> | <b>0.04(0.006)</b>  | <b>6.15E-12</b> | <b>0.47</b> | <b>0.0</b> |
| rs7649121         | 3/188051479         | T/A        | 0.20        | -0.07(0.007)        | 1.73E-18        | -0.07(0.011)        | 2.08E-08        | 0.01        | 0.5        |
| rs17366568        | 3/188053147         | G/A        | 0.90        | 0.15(0.009)         | 2.75E-66        | 0.2(0.027)          | 7.64E-13        | 1.1E-13     | 0.9        |
| rs1501299         | 3/188053817         | T/G        | 0.27        | 0.07(0.006)         | 1.75E-31        | 0.07(0.01)          | 7.15E-11        | 2.0E-03     | 0.6        |
| <b>rs3821799</b>  | <b>3/188054180</b>  | <b>T/C</b> | <b>0.45</b> | <b>0.03(0.005)</b>  | <b>3.25E-10</b> | <b>0.03(0.006)</b>  | <b>6.64E-07</b> | <b>0.12</b> | <b>0.3</b> |
| rs3774261         | 3/188054253         | G/A        | 0.61        | -0.07(0.005)        | 1.30E-49        | -0.07(0.007)        | 2.64E-21        | 0.01        | 0.5        |
| rs6773957         | 3/188056399         | G/A        | 0.61        | -0.07(0.005)        | 9.81E-50        | -0.07(0.007)        | 2.60E-21        | 0.01        | 0.5        |
| <b>rs1063538</b>  | <b>3/188056877</b>  | <b>T/C</b> | <b>0.38</b> | <b>0.06(0.005)</b>  | <b>6.15E-30</b> | <b>0.06(0.008)</b>  | <b>3.55E-13</b> | <b>0.03</b> | <b>0.5</b> |
| rs7639352         | 3/188061168         | T/C        | 0.29        | 0.07(0.005)         | 2.21E-46        | 0.07(0.008)         | 4.29E-17        | 1.3E-03     | 0.6        |
| rs6444175         | 3/188062438         | G/A        | 0.71        | -0.07(0.005)        | 6.85E-46        | -0.07(0.008)        | 7.01E-17        | 1.3E-03     | 0.6        |
| <b>rs7615090</b>  | <b>3/188073697</b>  | <b>T/G</b> | <b>0.88</b> | <b>0.06(0.008)</b>  | <b>2.81E-11</b> | <b>0.07(0.013)</b>  | <b>1.95E-07</b> | <b>0.06</b> | <b>0.4</b> |
| <b>rs2954018</b>  | <b>8/126546335</b>  | <b>T/C</b> | <b>0.70</b> | <b>0.03(0.005)</b>  | <b>4.81E-08</b> | <b>0.03(0.005)</b>  | <b>4.81E-08</b> | <b>0.65</b> | <b>0.0</b> |
| <b>rs2980880</b>  | <b>8/126550154</b>  | <b>G/A</b> | <b>0.31</b> | <b>-0.03(0.005)</b> | <b>1.11E-08</b> | <b>-0.03(0.005)</b> | <b>1.11E-08</b> | <b>0.55</b> | <b>0.0</b> |
| <b>rs2980879</b>  | <b>8/126550657</b>  | <b>T/A</b> | <b>0.69</b> | <b>0.03(0.005)</b>  | <b>1.08E-08</b> | <b>0.03(0.005)</b>  | <b>1.08E-08</b> | <b>0.55</b> | <b>0.0</b> |
| <b>rs2980878</b>  | <b>8/126550709</b>  | <b>G/C</b> | <b>0.30</b> | <b>-0.03(0.005)</b> | <b>1.56E-08</b> | <b>-0.03(0.005)</b> | <b>1.56E-08</b> | <b>0.60</b> | <b>0.0</b> |
| <b>rs2980876</b>  | <b>8/126550876</b>  | <b>T/C</b> | <b>0.69</b> | <b>0.03(0.005)</b>  | <b>1.20E-08</b> | <b>0.03(0.005)</b>  | <b>1.20E-08</b> | <b>0.58</b> | <b>0.0</b> |
| <b>rs2954026</b>  | <b>8/126553708</b>  | <b>T/G</b> | <b>0.30</b> | <b>-0.03(0.005)</b> | <b>2.16E-08</b> | <b>-0.03(0.005)</b> | <b>2.16E-08</b> | <b>0.61</b> | <b>0.0</b> |
| <b>rs7846466</b>  | <b>8/126554713</b>  | <b>T/C</b> | <b>0.30</b> | <b>-0.03(0.005)</b> | <b>2.41E-08</b> | <b>-0.03(0.005)</b> | <b>2.41E-08</b> | <b>0.61</b> | <b>0.0</b> |
| <b>rs2954032</b>  | <b>8/126562574</b>  | <b>G/A</b> | <b>0.70</b> | <b>0.03(0.005)</b>  | <b>4.11E-08</b> | <b>0.03(0.005)</b>  | <b>4.11E-08</b> | <b>0.61</b> | <b>0.0</b> |
| <b>rs2954033</b>  | <b>8/126562928</b>  | <b>G/A</b> | <b>0.70</b> | <b>0.03(0.005)</b>  | <b>4.30E-08</b> | <b>0.03(0.005)</b>  | <b>4.30E-08</b> | <b>0.60</b> | <b>0.0</b> |
| <b>rs2980859</b>  | <b>8/126568611</b>  | <b>G/C</b> | <b>0.69</b> | <b>0.03(0.005)</b>  | <b>4.88E-08</b> | <b>0.03(0.005)</b>  | <b>4.88E-08</b> | <b>0.61</b> | <b>0.0</b> |
| <b>rs2980888</b>  | <b>8/126576490</b>  | <b>T/C</b> | <b>0.29</b> | <b>-0.03(0.006)</b> | <b>3.92E-08</b> | <b>-0.03(0.006)</b> | <b>3.92E-08</b> | <b>0.82</b> | <b>0.0</b> |
| <b>rs2954038</b>  | <b>8/126576571</b>  | <b>C/A</b> | <b>0.29</b> | <b>-0.03(0.006)</b> | <b>4.82E-08</b> | <b>-0.03(0.006)</b> | <b>4.82E-08</b> | <b>0.78</b> | <b>0.0</b> |
| <b>rs11045172</b> | <b>12/20361488</b>  | <b>C/A</b> | <b>0.20</b> | <b>0.04(0.006)</b>  | <b>4.76E-08</b> | <b>0.04(0.008)</b>  | <b>1.87E-06</b> | <b>0.23</b> | <b>0.2</b> |
| <b>rs12812995</b> | <b>12/20369141</b>  | <b>G/C</b> | <b>0.63</b> | <b>-0.03(0.005)</b> | <b>3.10E-08</b> | <b>-0.03(0.005)</b> | <b>3.38E-07</b> | <b>0.33</b> | <b>0.1</b> |
| <b>rs1444636</b>  | <b>12/20384150</b>  | <b>G/C</b> | <b>0.63</b> | <b>-0.03(0.005)</b> | <b>3.39E-08</b> | <b>-0.03(0.005)</b> | <b>3.37E-07</b> | <b>0.33</b> | <b>0.1</b> |
| <b>rs10770643</b> | <b>12/20385101</b>  | <b>G/A</b> | <b>0.38</b> | <b>0.03(0.005)</b>  | <b>2.75E-08</b> | <b>0.03(0.005)</b>  | <b>5.44E-07</b> | <b>0.29</b> | <b>0.1</b> |
| <b>rs7303397</b>  | <b>12/20385638</b>  | <b>G/A</b> | <b>0.38</b> | <b>0.03(0.005)</b>  | <b>4.21E-08</b> | <b>0.03(0.005)</b>  | <b>7.16E-07</b> | <b>0.30</b> | <b>0.1</b> |
| <b>rs7955516</b>  | <b>12/20389303</b>  | <b>C/A</b> | <b>0.38</b> | <b>0.03(0.005)</b>  | <b>2.43E-08</b> | <b>0.03(0.005)</b>  | <b>5.28E-07</b> | <b>0.29</b> | <b>0.2</b> |
| <b>rs2120757</b>  | <b>12/20393267</b>  | <b>T/C</b> | <b>0.64</b> | <b>-0.03(0.005)</b> | <b>3.97E-08</b> | <b>-0.03(0.006)</b> | <b>3.65E-06</b> | <b>0.18</b> | <b>0.2</b> |
| <b>rs3943606</b>  | <b>12/20399304</b>  | <b>T/C</b> | <b>0.36</b> | <b>0.03(0.005)</b>  | <b>4.85E-08</b> | <b>0.03(0.006)</b>  | <b>5.47E-06</b> | <b>0.16</b> | <b>0.3</b> |
| <b>rs2009084</b>  | <b>12/20402460</b>  | <b>T/C</b> | <b>0.61</b> | <b>-0.03(0.005)</b> | <b>4.56E-08</b> | <b>-0.03(0.006)</b> | <b>6.83E-06</b> | <b>0.15</b> | <b>0.3</b> |
| <b>rs11057405</b> | <b>12/121347850</b> | <b>G/A</b> | <b>0.90</b> | <b>0.05(0.009)</b>  | <b>5.58E-09</b> | <b>0.05(0.01)</b>   | <b>1.43E-06</b> | <b>0.26</b> | <b>0.2</b> |
| <b>rs2454722</b>  | <b>12/121737171</b> | <b>G/A</b> | <b>0.18</b> | <b>0.04(0.006)</b>  | <b>5.66E-11</b> | <b>0.04(0.006)</b>  | <b>1.23E-10</b> | <b>0.43</b> | <b>0.0</b> |
| <b>rs601339</b>   | <b>12/121740696</b> | <b>G/A</b> | <b>0.18</b> | <b>0.04(0.006)</b>  | <b>3.88E-11</b> | <b>0.04(0.006)</b>  | <b>5.20E-11</b> | <b>0.44</b> | <b>0.0</b> |
| <b>rs4759361</b>  | <b>12/121744233</b> | <b>T/A</b> | <b>0.82</b> | <b>-0.04(0.006)</b> | <b>4.51E-11</b> | <b>-0.04(0.006)</b> | <b>1.48E-10</b> | <b>0.41</b> | <b>0.0</b> |
| <b>rs509548</b>   | <b>12/121747808</b> | <b>T/A</b> | <b>0.82</b> | <b>-0.04(0.006)</b> | <b>4.69E-11</b> | <b>-0.04(0.006)</b> | <b>1.95E-10</b> | <b>0.40</b> | <b>0.0</b> |

|            |              |     |      |              |          |              |          |      |     |
|------------|--------------|-----|------|--------------|----------|--------------|----------|------|-----|
| rs6488898  | 12/122769785 | G/A | 0.08 | -0.05(0.009) | 1.48E-09 | -0.05(0.011) | 1.03E-05 | 0.10 | 0.3 |
| rs11057354 | 12/122833591 | G/A | 0.88 | 0.04(0.007)  | 1.98E-09 | 0.04(0.008)  | 1.68E-07 | 0.25 | 0.2 |
| rs12317176 | 12/122970671 | T/C | 0.66 | -0.03(0.005) | 2.52E-08 | -0.03(0.005) | 2.52E-08 | 0.61 | 0.0 |
| rs7301953  | 12/122971824 | G/A | 0.68 | -0.03(0.005) | 1.83E-08 | -0.03(0.005) | 1.83E-08 | 0.73 | 0.0 |
| rs10846579 | 12/122973356 | T/C | 0.34 | 0.03(0.005)  | 2.92E-08 | 0.03(0.005)  | 2.92E-08 | 0.61 | 0.0 |
| rs11057394 | 12/122973629 | T/C | 0.67 | -0.03(0.005) | 7.32E-09 | -0.03(0.005) | 7.32E-09 | 0.77 | 0.0 |
| rs12809125 | 12/122973944 | G/A | 0.34 | 0.03(0.005)  | 2.86E-08 | 0.03(0.005)  | 2.86E-08 | 0.61 | 0.0 |
| rs7133378  | 12/122975455 | G/A | 0.69 | -0.03(0.005) | 1.29E-09 | -0.03(0.005) | 1.29E-09 | 0.65 | 0.0 |
| rs9971695  | 12/122979444 | G/A | 0.67 | -0.03(0.005) | 2.47E-08 | -0.03(0.005) | 2.47E-08 | 0.62 | 0.0 |
| rs3802999  | 12/122980051 | T/C | 0.33 | 0.03(0.005)  | 2.55E-08 | 0.03(0.005)  | 2.55E-08 | 0.60 | 0.0 |
| rs4930721  | 12/122983842 | T/C | 0.31 | 0.03(0.005)  | 1.49E-08 | 0.03(0.005)  | 1.49E-08 | 0.71 | 0.0 |
| rs12298484 | 12/122984627 | T/C | 0.33 | 0.03(0.005)  | 2.12E-08 | 0.03(0.005)  | 2.12E-08 | 0.61 | 0.0 |
| rs11057396 | 12/122985015 | C/A | 0.32 | 0.03(0.005)  | 4.57E-08 | 0.03(0.005)  | 4.57E-08 | 0.90 | 0.0 |
| rs11057397 | 12/122985681 | T/C | 0.33 | 0.03(0.005)  | 1.61E-08 | 0.03(0.005)  | 1.61E-08 | 0.59 | 0.0 |
| rs9863     | 12/122987406 | T/C | 0.65 | -0.03(0.005) | 3.30E-08 | -0.03(0.005) | 3.30E-08 | 0.73 | 0.0 |
| rs4930723  | 12/122989553 | G/C | 0.67 | -0.03(0.005) | 1.99E-08 | -0.03(0.005) | 1.99E-08 | 0.60 | 0.0 |
| rs11057401 | 12/122993259 | T/A | 0.69 | -0.03(0.005) | 6.89E-09 | -0.03(0.005) | 6.89E-09 | 0.74 | 0.0 |
| rs4930726  | 12/122994284 | T/C | 0.67 | -0.03(0.005) | 1.53E-08 | -0.03(0.005) | 1.53E-08 | 0.59 | 0.0 |
| rs2178663  | 12/122999858 | T/C | 0.31 | 0.03(0.005)  | 1.02E-08 | 0.03(0.005)  | 1.02E-08 | 0.70 | 0.0 |
| rs4405410  | 12/123001741 | T/A | 0.67 | -0.03(0.005) | 1.53E-08 | -0.03(0.005) | 1.53E-08 | 0.59 | 0.0 |
| rs7961449  | 12/123003168 | T/A | 0.67 | -0.03(0.005) | 1.50E-08 | -0.03(0.005) | 1.50E-08 | 0.58 | 0.0 |
| rs7964945  | 12/123003621 | T/A | 0.85 | -0.04(0.006) | 2.61E-08 | -0.04(0.006) | 2.61E-08 | 0.62 | 0.0 |
| rs3867146  | 12/123003958 | G/A | 0.88 | 0.04(0.007)  | 2.47E-08 | 0.04(0.008)  | 1.33E-07 | 0.35 | 0.1 |
| rs7132655  | 12/123004926 | G/C | 0.67 | -0.03(0.005) | 1.57E-08 | -0.03(0.005) | 1.57E-08 | 0.59 | 0.0 |
| rs4765219  | 12/123006063 | C/A | 0.67 | -0.03(0.005) | 1.76E-08 | -0.03(0.005) | 1.76E-08 | 0.60 | 0.0 |
| rs7958691  | 12/123006696 | T/G | 0.33 | 0.03(0.005)  | 1.67E-08 | 0.03(0.005)  | 1.67E-08 | 0.59 | 0.0 |
| rs7305864  | 12/123007833 | G/C | 0.33 | 0.03(0.005)  | 6.58E-09 | 0.03(0.005)  | 6.58E-09 | 0.72 | 0.0 |
| rs6488913  | 12/123011522 | G/C | 0.67 | -0.03(0.005) | 1.33E-08 | -0.03(0.005) | 1.33E-08 | 0.58 | 0.0 |
| rs7312404  | 12/123012681 | G/A | 0.32 | 0.03(0.005)  | 1.78E-08 | 0.03(0.005)  | 1.78E-08 | 0.85 | 0.0 |
| rs11831913 | 12/123012851 | T/C | 0.69 | -0.03(0.005) | 6.68E-09 | -0.03(0.005) | 6.68E-09 | 0.70 | 0.0 |
| rs6488914  | 12/123013794 | G/C | 0.69 | -0.03(0.005) | 1.53E-08 | -0.03(0.005) | 1.53E-08 | 0.71 | 0.0 |
| rs7973683  | 12/123015176 | C/A | 0.67 | -0.03(0.005) | 8.44E-09 | -0.03(0.005) | 8.44E-09 | 0.54 | 0.0 |
| rs4765127  | 12/123026120 | T/G | 0.33 | 0.03(0.005)  | 4.63E-09 | 0.03(0.005)  | 4.63E-09 | 0.66 | 0.0 |
| rs12311114 | 12/123026656 | C/A | 0.69 | -0.03(0.005) | 1.06E-08 | -0.03(0.005) | 1.06E-08 | 0.60 | 0.0 |
| rs4765528  | 12/123028207 | T/A | 0.69 | -0.03(0.005) | 4.56E-09 | -0.03(0.005) | 4.56E-09 | 0.71 | 0.0 |
| rs11057408 | 12/123030789 | T/G | 0.33 | 0.03(0.005)  | 1.09E-08 | 0.03(0.005)  | 1.09E-08 | 0.65 | 0.0 |
| rs7978610  | 12/123034525 | G/C | 0.67 | -0.03(0.005) | 1.61E-09 | -0.03(0.005) | 1.61E-09 | 0.86 | 0.0 |
| rs952632   | 12/123035691 | G/A | 0.33 | 0.03(0.005)  | 4.13E-09 | 0.03(0.005)  | 4.13E-09 | 0.69 | 0.0 |
| rs11837287 | 12/123036012 | T/C | 0.33 | 0.03(0.005)  | 5.79E-09 | 0.03(0.005)  | 5.79E-09 | 0.71 | 0.0 |
| rs7311969  | 12/123036286 | T/C | 0.67 | -0.03(0.005) | 4.43E-09 | -0.03(0.005) | 4.43E-09 | 0.63 | 0.0 |
| rs7307277  | 12/123041109 | G/A | 0.33 | 0.03(0.005)  | 5.81E-09 | 0.03(0.005)  | 5.81E-09 | 0.69 | 0.0 |
| rs7311233  | 12/123041893 | G/A | 0.31 | 0.03(0.005)  | 4.24E-09 | 0.03(0.005)  | 4.24E-09 | 0.69 | 0.0 |
| rs12809473 | 12/123042552 | T/A | 0.67 | -0.03(0.005) | 5.98E-09 | -0.03(0.005) | 5.98E-09 | 0.70 | 0.0 |

|            |              |     |      |              |          |              |          |         |     |
|------------|--------------|-----|------|--------------|----------|--------------|----------|---------|-----|
| rs12827409 | 12/123042659 | G/C | 0.33 | 0.03(0.005)  | 6.05E-09 | 0.03(0.005)  | 6.05E-09 | 0.70    | 0.0 |
| rs7135314  | 12/123044519 | T/A | 0.33 | 0.03(0.005)  | 6.22E-09 | 0.03(0.005)  | 6.22E-09 | 0.69    | 0.0 |
| rs4765148  | 12/123044590 | T/G | 0.31 | 0.03(0.005)  | 6.63E-09 | 0.03(0.005)  | 6.63E-09 | 0.62    | 0.0 |
| rs11057409 | 12/123045284 | T/C | 0.33 | 0.03(0.005)  | 5.59E-09 | 0.03(0.005)  | 5.59E-09 | 0.70    | 0.0 |
| rs7975482  | 12/123047643 | G/A | 0.33 | 0.03(0.005)  | 7.68E-09 | 0.03(0.005)  | 7.68E-09 | 0.68    | 0.0 |
| rs2130382  | 12/123050596 | G/C | 0.31 | 0.03(0.005)  | 8.27E-09 | 0.03(0.005)  | 8.27E-09 | 0.71    | 0.0 |
| rs12310367 | 12/123052631 | G/A | 0.33 | 0.03(0.005)  | 1.16E-08 | 0.03(0.005)  | 1.16E-08 | 0.63    | 0.0 |
| rs11057412 | 12/123055095 | G/C | 0.67 | -0.03(0.005) | 1.24E-08 | -0.03(0.005) | 1.24E-08 | 0.62    | 0.0 |
| rs1187415  | 12/123057482 | G/C | 0.33 | 0.03(0.005)  | 9.62E-09 | 0.03(0.005)  | 9.62E-09 | 0.55    | 0.0 |
| rs12303671 | 12/123058563 | T/G | 0.67 | -0.03(0.005) | 1.30E-08 | -0.03(0.005) | 1.30E-08 | 0.61    | 0.0 |
| rs7307053  | 12/123060493 | T/C | 0.31 | 0.03(0.005)  | 1.64E-08 | 0.03(0.005)  | 1.64E-08 | 0.69    | 0.0 |
| rs12824567 | 12/123061156 | G/C | 0.69 | -0.03(0.005) | 1.54E-08 | -0.03(0.005) | 1.54E-08 | 0.69    | 0.0 |
| rs863750   | 12/123071397 | T/C | 0.61 | -0.03(0.005) | 6.41E-09 | -0.03(0.005) | 6.41E-09 | 0.76    | 0.0 |
| rs10773049 | 12/123072584 | T/C | 0.62 | -0.03(0.005) | 2.67E-08 | -0.03(0.005) | 2.67E-08 | 0.74    | 0.0 |
| rs825453   | 12/123074711 | T/A | 0.62 | -0.03(0.005) | 4.03E-08 | -0.03(0.005) | 4.03E-08 | 0.77    | 0.0 |
| rs11057418 | 12/123074929 | G/C | 0.76 | 0.03(0.006)  | 3.14E-08 | 0.04(0.006)  | 1.06E-07 | 0.38    | 0.1 |
| rs2927328  | 16/80067223  | T/C | 0.36 | -0.03(0.005) | 1.69E-10 | -0.04(0.007) | 9.48E-07 | 0.03    | 0.4 |
| rs1471379  | 16/80068200  | T/C | 0.38 | -0.03(0.005) | 3.20E-10 | -0.03(0.006) | 7.32E-08 | 0.15    | 0.3 |
| rs1966957  | 16/80068580  | G/C | 0.38 | -0.03(0.004) | 2.66E-10 | -0.03(0.006) | 8.42E-08 | 0.13    | 0.3 |
| rs2927327  | 16/80069035  | T/A | 0.38 | -0.03(0.004) | 2.47E-10 | -0.03(0.006) | 7.77E-08 | 0.13    | 0.3 |
| rs2966079  | 16/80069307  | T/C | 0.55 | 0.03(0.005)  | 1.56E-11 | 0.04(0.007)  | 5.49E-07 | 0.01    | 0.5 |
| rs1471152  | 16/80070137  | T/G | 0.38 | -0.03(0.004) | 3.38E-10 | -0.03(0.006) | 8.23E-08 | 0.15    | 0.3 |
| rs2927324  | 16/80070322  | T/C | 0.55 | 0.03(0.005)  | 1.29E-11 | 0.04(0.007)  | 4.89E-07 | 0.01    | 0.5 |
| rs2927323  | 16/80070449  | G/A | 0.32 | -0.03(0.005) | 4.77E-12 | -0.04(0.007) | 5.18E-08 | 0.06    | 0.4 |
| rs2927322  | 16/80072006  | G/A | 0.70 | 0.04(0.005)  | 4.86E-13 | 0.04(0.007)  | 1.02E-08 | 0.07    | 0.4 |
| rs2966085  | 16/80074135  | G/A | 0.64 | 0.03(0.005)  | 5.70E-12 | 0.04(0.006)  | 1.21E-08 | 0.12    | 0.3 |
| rs2317241  | 16/80077267  | G/A | 0.70 | 0.03(0.005)  | 5.45E-11 | 0.04(0.006)  | 7.32E-09 | 0.22    | 0.2 |
| rs12443634 | 16/80081775  | C/A | 0.72 | 0.04(0.005)  | 1.59E-16 | 0.04(0.005)  | 1.57E-15 | 0.40    | 0.1 |
| rs2925979  | 16/80092291  | T/C | 0.30 | -0.04(0.005) | 1.87E-18 | -0.04(0.005) | 1.87E-18 | 0.52    | 0.0 |
| rs2966093  | 16/80096121  | G/A | 0.36 | -0.04(0.005) | 1.36E-16 | -0.04(0.006) | 1.59E-10 | 0.09    | 0.4 |
| rs2966094  | 16/80096138  | C/A | 0.65 | 0.04(0.005)  | 5.53E-17 | 0.04(0.006)  | 5.90E-11 | 0.09    | 0.3 |
| rs2927307  | 16/80101333  | G/A | 0.42 | -0.04(0.004) | 4.16E-17 | -0.04(0.006) | 1.05E-09 | 0.04    | 0.4 |
| rs2966095  | 16/80106959  | G/A | 0.64 | 0.04(0.005)  | 1.94E-16 | 0.04(0.006)  | 5.81E-11 | 0.12    | 0.3 |
| rs2966097  | 16/80107209  | T/C | 0.64 | 0.04(0.005)  | 1.48E-14 | 0.04(0.007)  | 7.19E-09 | 0.08    | 0.4 |
| rs11865200 | 16/81183206  | G/A | 0.16 | -0.04(0.006) | 1.14E-09 | -0.04(0.009) | 3.84E-05 | 0.03    | 0.4 |
| rs7196910  | 16/81183882  | G/C | 0.28 | -0.03(0.005) | 1.63E-08 | -0.03(0.008) | 1.58E-04 | 0.01    | 0.5 |
| rs8058318  | 16/81185746  | G/A | 0.35 | 0.03(0.005)  | 3.26E-08 | 0.03(0.005)  | 8.05E-07 | 0.27    | 0.2 |
| rs8047615  | 16/81191554  | G/A | 0.75 | 0.03(0.005)  | 2.34E-08 | 0.03(0.008)  | 1.71E-04 | 0.01    | 0.5 |
| rs8062637  | 16/81192869  | T/C | 0.22 | -0.04(0.005) | 6.08E-10 | -0.04(0.009) | 2.29E-04 | 9.8E-04 | 0.6 |
| rs7200895  | 16/81202107  | T/C | 0.83 | 0.04(0.006)  | 1.85E-12 | 0.05(0.015)  | 5.52E-04 | 8.7E-10 | 0.8 |
| rs3852724  | 16/81203595  | C/A | 0.82 | 0.04(0.006)  | 9.62E-10 | 0.05(0.013)  | 8.07E-04 | 1.2E-08 | 0.8 |
| rs3865185  | 16/81203963  | T/A | 0.18 | -0.04(0.006) | 7.08E-10 | -0.05(0.013) | 7.03E-04 | 1.1E-08 | 0.8 |
| rs3865186  | 16/81204473  | G/A | 0.20 | -0.03(0.005) | 9.53E-09 | -0.04(0.011) | 6.58E-04 | 1.1E-06 | 0.7 |

|                   |                    |            |             |                     |                 |                     |                 |             |            |
|-------------------|--------------------|------------|-------------|---------------------|-----------------|---------------------|-----------------|-------------|------------|
| <b>rs8060301</b>  | <b>16/81219245</b> | <b>T/A</b> | <b>0.54</b> | <b>0.03(0.004)</b>  | <b>3.28E-08</b> | <b>0.03(0.006)</b>  | <b>1.48E-05</b> | <b>0.07</b> | <b>0.4</b> |
| <b>rs4783244</b>  | <b>16/81219769</b> | <b>T/G</b> | <b>0.46</b> | <b>-0.03(0.004)</b> | <b>3.70E-08</b> | <b>-0.03(0.006)</b> | <b>3.17E-05</b> | <b>0.05</b> | <b>0.4</b> |
| <b>rs12051272</b> | <b>16/81220789</b> | <b>T/G</b> | <b>0.03</b> | <b>-0.28(0.018)</b> | <b>1.41E-49</b> | <b>-0.3(0.03)</b>   | <b>1.48E-21</b> | <b>0.05</b> | <b>0.5</b> |
| rs8047711         | 16/81225172        | G/A        | 0.97        | 0.18(0.015)         | 4.10E-29        | 0.18(0.031)         | 1.55E-08        | 8.8E-05     | 0.7        |
| rs16957913        | 16/81227750        | T/C        | 0.97        | 0.16(0.015)         | 8.13E-25        | 0.17(0.033)         | 1.21E-06        | 4.0E-06     | 0.8        |
| rs12599599        | 16/81228040        | G/A        | 0.97        | 0.16(0.015)         | 3.90E-25        | 0.17(0.033)         | 6.96E-07        | 7.7E-06     | 0.7        |
| <b>rs12922394</b> | <b>16/81229828</b> | <b>T/C</b> | <b>0.07</b> | <b>-0.1(0.011)</b>  | <b>3.16E-18</b> | <b>-0.1(0.015)</b>  | <b>1.31E-11</b> | <b>0.14</b> | <b>0.3</b> |
| <b>rs1870843</b>  | <b>16/81316815</b> | <b>G/A</b> | <b>0.36</b> | <b>0.03(0.005)</b>  | <b>4.26E-11</b> | <b>0.03(0.005)</b>  | <b>3.49E-09</b> | <b>0.26</b> | <b>0.2</b> |
| <b>rs11150491</b> | <b>16/81318003</b> | <b>T/G</b> | <b>0.63</b> | <b>-0.03(0.005)</b> | <b>2.20E-10</b> | <b>-0.03(0.005)</b> | <b>2.20E-10</b> | <b>0.50</b> | <b>0.0</b> |
| <b>rs889140</b>   | <b>19/38580840</b> | <b>G/A</b> | <b>0.35</b> | <b>-0.03(0.005)</b> | <b>9.81E-10</b> | <b>-0.03(0.005)</b> | <b>1.58E-08</b> | <b>0.30</b> | <b>0.1</b> |
| <b>rs889139</b>   | <b>19/38581209</b> | <b>G/A</b> | <b>0.65</b> | <b>0.03(0.005)</b>  | <b>1.09E-09</b> | <b>0.03(0.005)</b>  | <b>1.53E-08</b> | <b>0.30</b> | <b>0.1</b> |
| <b>rs731839</b>   | <b>19/38590905</b> | <b>G/A</b> | <b>0.35</b> | <b>-0.04(0.005)</b> | <b>2.20E-13</b> | <b>-0.04(0.005)</b> | <b>6.43E-13</b> | <b>0.42</b> | <b>0.0</b> |
| <b>rs4805885</b>  | <b>19/38597963</b> | <b>T/C</b> | <b>0.39</b> | <b>-0.03(0.005)</b> | <b>1.25E-11</b> | <b>-0.03(0.005)</b> | <b>1.25E-11</b> | <b>0.47</b> | <b>0.0</b> |
| <b>rs8182584</b>  | <b>19/38601550</b> | <b>T/G</b> | <b>0.38</b> | <b>-0.03(0.005)</b> | <b>6.64E-11</b> | <b>-0.03(0.005)</b> | <b>6.64E-11</b> | <b>0.55</b> | <b>0.0</b> |

\*SNP with I2 less than 0.5 are listed in bold.

EA: Effect Allele

NEA: Non-Effect Allele
