# Supplementary material for: Novel Loci for Adiponectin Levels and Their Influence on Type 2 Diabetes and Metabolic Traits: A Multi-Ethnic Meta-Analysis of 45,891 Individuals
Source: PLoS Genet. 2012 Mar 29;8(3):e1002607. doi: 10.1371/journal.pgen.1002607 (PMC3315470; doi:10.1371/journal.pgen.1002607)
Supplement: Table S1 — Cohort characteristics. (XLSX) [file pgen.1002607.s004.xlsx]

## Sheet: Sheet1
Table S1. Cohort characteristics.
		COHORT INFORMATION			ADIPONECTIN MEASUREMENTS	SAMPLES					GENOTYPING data				Number of SNPs Failing QC Criteria (prior to meta analysis)
	COHORT	Ethnicity	Country	Collection type	Assay	Samples with ADIPONECTIN phenotype N all (N males / N females)	Adiponectin [Mean (SD) ] (µg/ml) (SD)	Adiponectin [Mean (SD) males / Mean (SD) females], years	Age [Mean (SD) males / Mean (sd) females], years	BMI [Mean (SD) males / Mean (SD) females], kg / m2	Genotyping platform and SNP panel	Genotyping centre	Genotyping calling algorithm	Imputation software	MAF [filter detail (<1%) / N SNPs excluded]	HWE [filter detail (<10-6) / N SNPs excluded]	Call rate [filter detail ( <95%) / N SNPs excluded]	Quality metrics [filter detail / N SNPs excluded]/	SNP number in QC'd dataset	λgc
Discovery phase European Cohorts	ALSPAC	European descent	UK	Population-based	ELISA	2692(1394/1298)	13.2(5.5)	12.8(5.3)/13.5(5.7)	9.8 (3.6)/9.8 (3.4)	17.2(2.45)/17.7(2.8)	Illumina 317 & 610	Wellcome Trust Sanger Inst & CNG	Illuminus	MACH	81893	-	-	r2<0.3 / 285,531	2483534	1.012
	BLSA	European descent	USA	Population-based	RIA	567(301/266)	15.8(10.7)	13.8(10.31)/18.1(10.8)	72.9(13.1)/68.2(14.8)	27.3(4.2)/26.1(5.1)	Illumina HumanHap550	NIA	Beadstudio	MACH	4118	313		r2<0.3 / 0	2449692	1.029
	Colaus	European descent	Switzerland	Population-based	ELISA	5261(2502/2759)	10.0(8.1)	7.4(5.4)/12.4(9.4)	52.7(10.8)/53.6(10.7)	26.6(4.2)/25.1(4.9)	Affymetrix Genechip Human Mapping 500k array	Affymetrix/GEA	BRLMM	IMPUTE	61286	863	30325	r2<0.3 / 70,606	2408224	1.001
	ERF	European descent	Netherlands	Family based	RIA	1817(765/1052)	10.7(5.7)	8.1(4.1)/12.2(5.9)	49.6(14.4)/48.0(14.4)	27.4(4.2)/26.5(4.9)	Illumina HumanHap300	Leiden Genome Tecnology Center (LGTC) and others.	Illuminus	MACH	98844	-	-	r2<0.3 / 75,835	2408720	1
	FHS	European descent	USA	Cohort	ELISA	2223(1008/1215)	10.5(6.4)	7.6(4.6)/13.0(6.7)	60.3(9.5)/60.4(9.5)	28.4(4.3)/27.2(5.4)	Affymetrix 500k and MIPS 50k genotyping arrays	Affymetrix	BRLMM	MACH	128927	20469	23093	r2<0.3 / 63,144	2428839	1.028
	GEMS	European descent	USA, Canada, Finland, Australia, Switzerland	Cohort	ELISA	1780(1048/732)	6.8(4.8)	5.8(4.0)/8.4(5.5)	52.5(9.4)/52.4(9.5)	28.3(3.4)/28.7 (3.9)	Affymetrix Genechip Human Mapping 500k array	Affymetrix/GEA	BRLMM	IMPUTE	48643	630	65333	r2<0.3 / 63,281	2439316	1.005
	InCHIANTI	European descent	Italy	Population-based	RIA	1033(463/570)	13.4(9.7)	10.5(7.6)/15.8(10.7)	-	27.2(4.2)/27.2(4.7)	Illumina HumanHap550	-	-	-	68816	-	-	r2<0.3 / 50,146	2445403	1.039
	KORA F3 (GWAS)	European descent	Germany	Population-based	ELISA	1636(809/827)	10.6(4.7)	9.9 (3.7)/12.3(4.9)	63.0(10.1)/62.1(10.1)	28.2(3.8)/28.0(5.1)	Affymetrix Genechip Human Mapping 500k array	Helmholtz Center Munich	BRLMM	MACH	2043	4735	0	r2≥0.3/ 76783	2327028	1.025
	MICROS	European descent	Italy	Population-based	ELISA	1194(517/677)	13.5 (8.4)	10.7(5.3)/15.6(9.6)	44.9(16.1)/44.8(17.1)	25.8(3.9)/25.0(5.3)	Illumina HumanHap300v2	Helmholz Centre Munich	Beadstudio	MACH	68642	580	2985	r2<0.3 /??	2375117	1.014
	TUK1	European descent	UK	Population-based	ELISA	968(0 /968)	8.2(3.9)	NA/8.2(3.9)	NA/48.6(12.1)	NA/25.1(4.7)	Illumina HumanHap300, HumanCNV370 Duo and HumanHap 550	WTSI	Illuminus	IMPUTE	181472	1342	3304	prop inf <0.4 /	2356866	1.004
	TUK23	European descent	UK	Population-based	ELISA	1229(0 /1229)	7.9(3.9)	NA/7.9(3.9)	NA/50.5(13.1)	NA/25.3(4.6)	Illumina HumanHap300, HumanCNV370 Duo and HumanHap 550	WTSI	Illuminus	IMPUTE	161395	3038	3052	prop inf <0.4 /	2421867	1.013
	CHS	European descent	US	Population-based	ELISA	2718(1061/1657)	9.5(0.5)	9.7(0.5)/9.6(0.5)	75.4(5.3)/74.5(4.8)	26.4(3.6)/ 26.4(4.9)	CNV370	General Clinical Research Center's Phenotyping/Genotyping Laboratory at Cedars-Sinai	Beadstudio	BimBam	39674	-	-	348199	2261278	1
	YFS	European descent	Finland	Population-based	RIA	2424(1116/1308)	9.4(4.5)	7.5(3.4)/11.1(4.6)	32.5(5.3)/32.3(5.2)	26.0(4.2)/24.6(4.7)	Illumina Human670k custom chip	Welcome Trust Sanger Institute	Illuminus	MACH	98637	11766	7746	r2 < 0.3 / 54510	2458387	1
	HBCS	European descent	Finland	Population-based birth cohort	ELISA	1723(734/989)	6.5(5.8)	4.5(3.9)/8.0(6.4)	61.4(2.8)/61.6(3.1)	27.6(4.3)/27.8(5.1)	Illumina Human660W	Wellcome Trust Sanger Institute	Illuminus	MACH	93281	25	59	r2 < 0.3 / 51199	2477911	1
	DILGOM	European descent	Finland	Population-based	ELISA	687(334/353)	4.9(3.8)	3.5(2.8)/6.3(4.2)	54.1(13.0)/53.1(13.8)	26.8(3.8)/26.6(5.5)	Illumina Human610W	Wellcome Trust Sanger Institute	Illuminus	MACH	93540	3	511	r2 < 0.3 / 52400	2469485	1
	Fenland	European descent	UK	Population-based	DELFIA	1395(610/785)	6.1(3.4)	4.3(1.9)/7.6(1.9)	44.5(7.34)/45.4(7.2)	27.6 (3.9)/26.7(5.5)	Affymetrix GeneChip Human Mapping 500K Array Set	WTSI	BRLMM	IMPUTE	70432	614	-	194754	1946379	1.019
Follow-up phase European Cohorts	HABC	Caucasian	USA	Community-based cohort	RIA	1661(878/783)	12.8(6.9)	10.4(5.7)/15.4(7.2)	73.9(2.9)/73.6(2.8)	27.1(3.7)/26.1(4.5)	Illumina Human1M-Duo BeadChip	Center for Inherited Disease Research (CIDR)	Illumina BeadStudio Genotyping Module, version 3.3.7	MACH software version 1.0.16	NA	NA	NA	NA	2543887	1
	NHS	Caucasian	USA	Population-based cohort	RIA	1587(0/1587)	16.3(7.6)	NA/16.3(7.6)	NA/56.4(6.9)	28.1(5.8)	Affymetrix 6.0 Genechip Human Mapping 1M array	Broad	Birdseed v1.33	MACH	NA	NA	NA	r2<0.3	2543722	1
	HPFS	Caucasian	USA	Population-based cohort	RIA	682(682/0)	16.1(8.2)	16.1(8.2)/NA	63.7(11.1)/NA	27.6(4.4)	Affymetrix 6.0 Genechip Human Mapping 1M array	Broad	Birdseed	MACH	NA	NA	NA	r2<0.3	2543345	1
	LLS	Caucasian	The Netherlands	Family -based	ELISA	1921(870/1051)	6.3(3.3)	4.8(2.2)/7.5(3.5)	59.9(6.6)/58.7(6.6)	25.8(3.1)/25.1(3.9)	Illumina 1)Human660W, 2)OmniExpress	1)Rotterdam, The Netherlands 2) Estonian Biocentre, Genotyping Core Facility, Estonia	GenomeStudio	IMPUTE	NA	NA	NA	NA	657	1
	GARP	Caucasian	The Netherlands	Osteoarthritis cases	ELISA	149(28/121)	25.5(16.4)	15.8(8.8)/27.8(16.9)	60.1(8.3)/59.7(7.1)	27.6(3.5)/27.3(5.4)	Illumina Human660W	Rotterdam, The Netherlands	Genome studio	Impute	0.05	0	0.0001	NA	NA	1
	ERF2	European descent	Netherlands	Family based	RIA	320(156/164)	9.8(4.6)	7.7(4.2)/11.8(5.0)	49.3(12.6)/48.9(14.0)	26.6(3.6)/26.6(5.6)	Illumina HumanHap300	Leiden Genome Tecnology Center (LGTC) and others.	Illuminus	MACH	98844	-	-	r2<0.3 / 75.835	2408720	1
	ARIC	Caucasian	United States	Population-based	RIA	303(126/177)	9.8 (4.4)	7.5(3.0)/11.5(4.4)	53.8(6.0)/52.5(5.4)	27.7(3.6)/26.3(5.0)	Affymetrix Genome-Wide Human SNP Array 6.0	Broad Institute of MIT and Harvard	Birdseed	Mach2qtl	NA	NA	NA	NA	662	1
	KORA3 (nonGWAS)	European descent	Germany	Population-based	ELISA	1477(699/778)	10.3(4.5)	8.4(3.6)/12.0(4.5)	51.4(13.3)/51.8(13.0)	27.7(4.0)/26.5(5.2)	Taqman assays	Innsbruck	-	-	0	0	0	0	8	1
	SAPHIR	European descent	Austria	Healthy-working population	ELISA	1698(1073/637)	8.6(4.6)	7.1(3.3)/ 11.1(5.2)	48.8(5.4)/55.7(4.3)	26.9(3.7)/26.1(4.7)	Taqman assays	Innsbruck	-	-	0	0	0	0	8	1
	THISEAS	European	Greece	CAD case-control	ELISA	738(294/444)	10.0(5.7)	7.7(4.4)/11.5 (5.9)	57.4(14.5)/62.3(13.7)	29.0(4.2)/28.9(5.4)	Metabochip	Sanger	GenoSNP	IMPUTE	0	0	0	0	47	1
Non-European Cohorts	CHS	African American	US	Population-based	ELISA	724(256/459)	9.1(0.6)	9.0(0.6)/9.2(0.5)	72.8(5.7)/73.5(5.6)	26.9(4.4)/29.6(6.0)	Illumina HumanOmni1-Quad_v1 BeadChip	General Clinical Research Center's Phenotyping/Genotyping Laboratory at Cedars-Sinai	Beadstudio	Beagle	NA	NA	NA	NA	2770583	1
	JHS	African Americans	USA	Community-based cohort with nested families	ELISA	1662(667/995 )	8.3(0.7)	8.1(0.7)/8.5(0.6)	53.7(12.9)/54.8(12.4)	29.9(6.1)/32.8 (7.5)	Affymetrix 6.0 Genechip Human Mapping 1M array	Broad	Birdseed	MACH	1274	3607	NA	NA	2815304	1.052
	CFS	African Americans	USA	Family based cohort	ELISA	356	4.9(0.8)	4.6(0.8)/5.1(0.7)	40.5(19.3)/39.7(18.6)	32.0(9.0)/33.7(10.2)	Affymetrix 6.0 Genechip Human Mapping 1M array	Broad	Birdseed	MACH	NA	NA	NA	NA	2559380	1.25
	MESA	African Americans	USA	Community-based cohort	ELISA	353(163/190)	9.6(0.5)	9.5(0.5)/9.7(0.5)	63.3(9.8)/64.3(9.8)	28.6(4.6)/30.4(5.8)	Affymetrix 6.0 Genechip Human Mapping 1M array	Broad	Birdseed	MACH	17742	NA	3468	NA	2810598	0.99
	CLHNS	Filipinos	Philippines	Community-based cohort	ELISA	1776(0/1776)	2.8(1.3)	NA/2.8(1.3)	NA /48.4(6.1)	NA/24.3(4.4)	Affymetrix Genomewide Human SNP Array 5.0	Vanderbilt Microarray Shared Resource at Vanderbilt University Medical Center	Birdseed	MACH	30351	42	7269	150177	2304702	1.03
	HABC	AA	USA	Community-based cohort	RIA	1137(486/651)	9.5(6.3)	7.9(5.3)/10.7(6.7)	73.5(2.8)/73.4(3.0)	27.2(4.4)/29.6(5.8)	Illumina Human1M-Duo BeadChip	Center for Inherited Disease Research (CIDR)	Illumina BeadStudio Genotyping Module, version 3.3.7	MACH software version 1.0.16	NA	NA	NA	NA	1958375	1
